# Supplementary material for: Optimization of Cr/SBA-15 Catalysts for CO₂-Assisted Oxidative Dehydrogenation of Propane to Propylene
Source: Research Square preprint supplement (doi:10.21203/rs.3.rs-7585968/v1), 2025-09-22
Supplement: Supplementary file 1 [file 6a664f3ddfd09fc27daa00a4.docx]

**Supplementary Materials**

**Optimization of Cr/SBA-15 Catalysts for CO₂-Assisted Oxidative Dehydrogenation of Propane to Propylene**

Armin Moniri1, Sandeep Badoga1, Mohamed Ali1, Jinwen Chen1 and Mohsen Shakouri2

1 Natural Resources Canada, CanmetENERGY Devon, 1 Oil Patch Drive, Devon, AB, T9G 1A8, Canada

2 Canadian Light Source, Saskatoon, Saskatchewan, Canada, 44 Innovation Blvd, Saskatoon, SK S7N 2V3

**Correspondence:** [armin.moniri@NRCan-RNCan.gc.ca](mailto:armin.moniri@NRCan-RNCan.gc.ca)

1. **Supplementary Tables**

**TABLE S1.** Quadruplicate ODH data for each Taguchi condition (two runs × two GC injections) including the optimal run (Run 10), corresponding to data in Table 4.

| **No.** | **T (°C)** | **Cr (wt %)** | **W/F**  **(g min mL⁻¹)** | **Propane Conversion (%)** | **CO₂ Conversion (%)** | **Propylene Selectivity (%)** | **Ethylene Selectivity (%)** |
| --- | --- | --- | --- | --- | --- | --- | --- |
| 1 a | 550 | 5 | 0.010 | 22.1 | 11.1 | 70.2 | 3.0 |
| 1 b | 22.9 | 11.3 | 69.1 | 3.1 |
| 1 c | 21.7 | 10.6 | 71.4 | 2.9 |
| 1 d | 22.4 | 10.8 | 70.6 | 3.1 |
| 2 a | 550 | 7 | 0.015 | 18.4 | 3.2 | 88.5 | 5.0 |
| 2 b | 18.1 | 3.3 | 87.2 | 5.1 |
| 2 c | 19.1 | 3.1 | 89.6 | 4.7 |
| 2 d | 18.7 | 3.4 | 88.1 | 5.2 |
| 3 a | 550 | 10 | 0.020 | 28.9 | 12.8 | 75.7 | 3.3 |
| 3 b | 28.1 | 12.5 | 76.9 | 3.2 |
| 3 c | 29.4 | 13.0 | 74.5 | 3.4 |
| 3 d | 28.7 | 12.6 | 75.9 | 3.3 |
| 4 a | 600 | 5 | 0.015 | 33.1 | 8.7 | 84.1 | 5.8 |
| 4 b | 32.4 | 8.5 | 82.9 | 6.0 |
| 4 c | 34.3 | 8.9 | 83.6 | 5.6 |
| 4 d | 32.9 | 8.6 | 84.7 | 5.9 |
| 5 a | 600 | 7 | 0.020 | 32.9 | 8.2 | 84.1 | 6.4 |
| 5 b | 31.6 | 8.0 | 83.5 | 6.3 |
| 5 c | 33.4 | 8.4 | 84.9 | 6.2 |
| 5 d | 32.5 | 8.1 | 83.8 | 6.6 |
| 6 a | 600 | 10 | 0.010 | 25.6 | 7.9 | 83.7 | 6.8 |
| 6 b | 24.9 | 7.7 | 82.5 | 7.0 |
| 6 c | 25.8 | 8.1 | 84.3 | 6.6 |
| 6 d | 26.3 | 7.8 | 83.4 | 6.9 |
| 7 a | 650 | 5 | 0.020 | 45.7 | 13.4 | 74.5 | 17.0 |
| 7 b | 46.9 | 13.1 | 73.2 | 17.5 |
| 7 c | 44.2 | 13.7 | 75.4 | 16.8 |
| 7 d | 45.3 | 13.5 | 74.7 | 17.1 |
| 8 a | 650 | 7 | 0.010 | 37.7 | 11.9 | 71.7 | 15.8 |
| 8 b | 38.1 | 11.6 | 72.5 | 15.3 |
| 8 c | 36.4 | 12.0 | 70.9 | 16.1 |
| 8 d | 37.5 | 11.8 | 71.3 | 15.9 |
| 9 a | 650 | 10 | 0.015 | 40.8 | 13.9 | 72.6 | 14.8 |
| 9 b | 39.4 | 13.5 | 71.2 | 15.1 |
| 9 c | 41.2 | 14.1 | 73.4 | 14.4 |
| 9 d | 40.1 | 13.7 | 72.1 | 14.9 |
| 10 a | 600 | 7 | 0.015 | 36.7 | 14.0 | 83.6 | 5.1 |
| 10 b | 37.0 | 14.3 | 83.9 | 5.4 |
| 10 c | 37.2 | 14.5 | 84.1 | 5.6 |
| 10 d | 37.5 | 14.8 | 84.4 | 5.9 |

**TABLE S2.**  Particle size statistics for Cr/SBA-15 catalysts based on three (50 nm, 100 nm, and 200 nm) TEM images per sample corresponding to Figure 8 and Figure S1.

| Catalyst | n | Mean (nm) | Median (nm) | Geo mean ± GSD (nm) |
| --- | --- | --- | --- | --- |
| 5 % Cr/SBA-15 | 1200 | 3.24 | 3.17 | 3.14 ± 1.29 |
| 7 % Cr/SBA-15 | 1531 | 6.84 | 6.59 | 6.59 ± 1.32 |
| 10 % Cr/SBA-15 | 1952 | 8.61 | 8.04 | 8.10 ± 1.41 |

**TABLE S3.**  H₂-TPR peak temperatures and integrated H₂ uptake values for Cr/SBA-15 catalysts with varying chromium loadings, corresponding to data in Figure 11.

| **Catalyst** | **Peak #** | **Tmax (°C)** | **Quantity (mmol g⁻¹)** | **Total H2 consumption (mmol g⁻¹)** |
| --- | --- | --- | --- | --- |
| 5 % Cr/SBA-15 | 1 | 276 | 15.50 | 17.32 |
| 2 | 460.9 | 1.82 |
| 7 % Cr/SBA-15 | 1 | 279.5 | 13.86 | 19.01 |
| 2 | 426.3 | 5.15 |
| 10 % Cr/SBA-15 | 1 | 283.0 | 12.41 | 15.07 |
| 2 | 444.5 | 2.66 |

**TABLE S4.** Catalytic performance (mean ± SD) for Taguchi runs, the optimal condition (Run 10) and carbon balance, corresponding to data in Table 4.

| Run | T  (°C) | Cr  (wt %) | W/F  (g min mL⁻¹) | Propane Conv. (%) | CO₂ Conv. (%) | Propylene Sel. (%) | Ethylene Sel. (%) | Cout  (g min−1) | Carbon Recovery (%) |
| --- | --- | --- | --- | --- | --- | --- | --- | --- | --- |
| 1 | 550 | 5 | 0.010 | 22.3 ± 0.5 | 11.0 ± 0.3 | 70.3 ± 1.0 | 3.0 ± 0.1 | 0.0255 | 93.8 |
| 2 | 550 | 7 | 0.015 | 18.6 ± 0.4 | 3.2 ± 0.1 | 88.4 ± 1.0 | 5.0 ± 0.2 | 0.0258 | 95.2 |
| 3 | 550 | 10 | 0.020 | 28.8 ± 0.5 | 12.7 ± 0.2 | 75.8 ± 1.0 | 3.3 ± 0.1 | 0.0259 | 95.4 |
| 4 | 600 | 5 | 0.015 | 33.2 ± 0.8 | 8.7 ± 0.2 | 83.8 ± 0.8 | 5.8 ± 0.2 | 0.0261 | 96.2 |
| 5 | 600 | 7 | 0.020 | 32.6 ± 0.8 | 8.2 ± 0.2 | 84.1 ± 0.6 | 6.4 ± 0.2 | 0.0259 | 95.6 |
| 6 | 600 | 10 | 0.010 | 25.6 ± 0.6 | 7.9 ± 0.2 | 83.5 ± 0.7 | 6.8 ± 0.2 | 0.0258 | 95.1 |
| 7 | 650 | 5 | 0.020 | 45.5 ± 1.1 | 13.4 ± 0.3 | 74.4 ± 0.9 | 17.1 ± 0.3 | 0.0264 | 97.3 |
| 8 | 650 | 7 | 0.010 | 37.4 ± 0.7 | 11.8 ± 0.2 | 71.6 ± 0.7 | 15.8 ± 0.3 | 0.0260 | 96.0 |
| 9 | 650 | 10 | 0.015 | 40.4 ± 0.8 | 13.8 ± 0.3 | 72.3 ± 0.9 | 14.8 ± 0.3 | 0.0258 | 95.2 |
| 10 | 600 | 7 | 0.015 | 37.1 ± 0.4 | 14.4 ± 0.2 | 84.0 ± 0.5 | 5.5 ± 0.1 | 0.0260 | 95.8 |

- Cin is 0.0271 g min−1 for all runs.

**TABLE S5.** Response Table for Signal-to-Noise Ratios (Larger is Better), corresponding to data in Table 4.

| Level | T (°C) | Cr Loading (wt %) | W/F (g min mL⁻¹) |
| --- | --- | --- | --- |
| 1 | 37.82 | 37.61 | 37.49 |
| 2 | 38.46 | 38.17 | 38.19 |
| 3 | 37.24 | 37.74 | 37.84 |
| Delta | 1.23 | 0.56 | 0.70 |

**TABLE S6.** Response Table for Means, corresponding to data in Table 4.

| Level | T (°C) | Cr Loading (wt %) | W/F (g min mL⁻¹) |
| --- | --- | --- | --- |
| 1 | 78.17 | 76.17 | 75.13 |
| 2 | 83.80 | 81.37 | 81.50 |
| 3 | 72.77 | 77.20 | 78.10 |
| Delta | 11.03 | 5.20 | 6.37 |
| Rank | 1 | 3 | 2 |

- “Delta” = (maximum response − minimum response).
- “Rank” indicates the relative influence of each factor on mean propylene selectivity (1 = highest impact, 3 = lowest).

**TABLE S7.** Three-factor ANOVA for propylene selectivity (n = 36) for first 9 runs, corresponding to data in Table 4 (and Table S1).

| Source | SS | df | MS | F-ratio | p-value |
| --- | --- | --- | --- | --- | --- |
| Temperature | 726.2 | 2 | 363.1 | 35.1 | 1.8 × 10⁻⁸ |
| Cr loading | 178.8 | 2 | 89.4 | 8.65 | 1.1 × 10⁻³ |
| W/F | 243.6 | 2 | 121.8 | 11.79 | 1.8 × 10⁻⁴ |
| Residual (error) | 299.6 | 29 | 10.3 | — | — |
| Total | 1448.2 | 35 | — | — | — |

1. **Supplementary Figures**


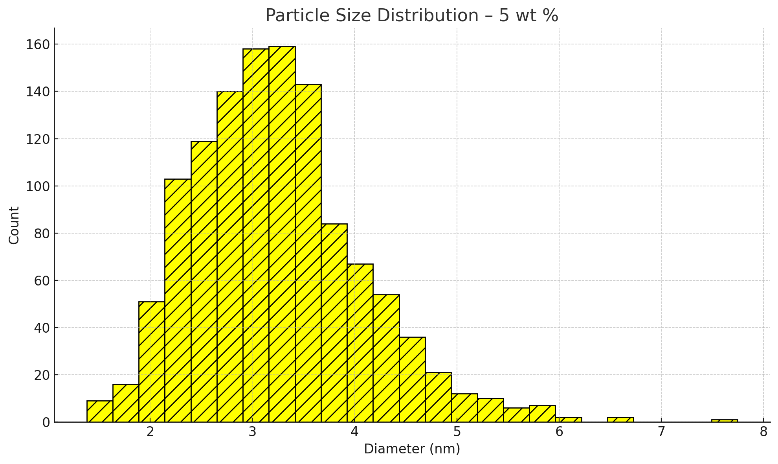


(a)


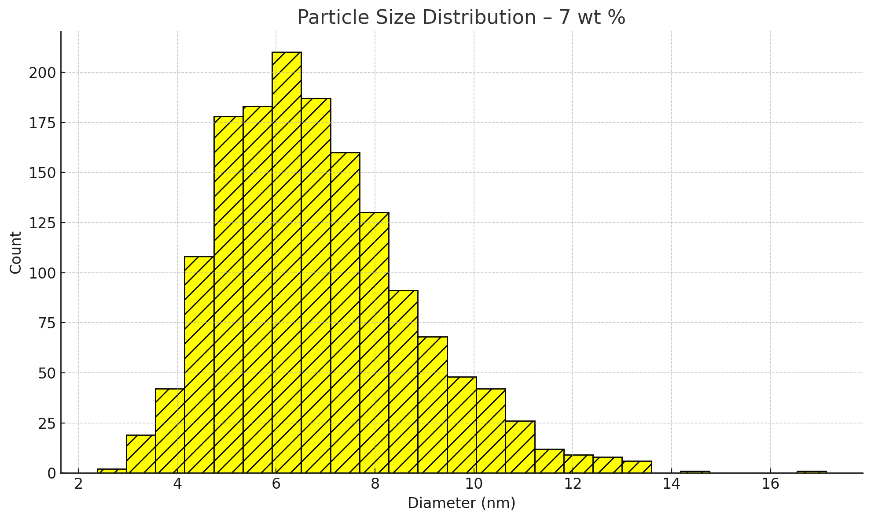


(b)


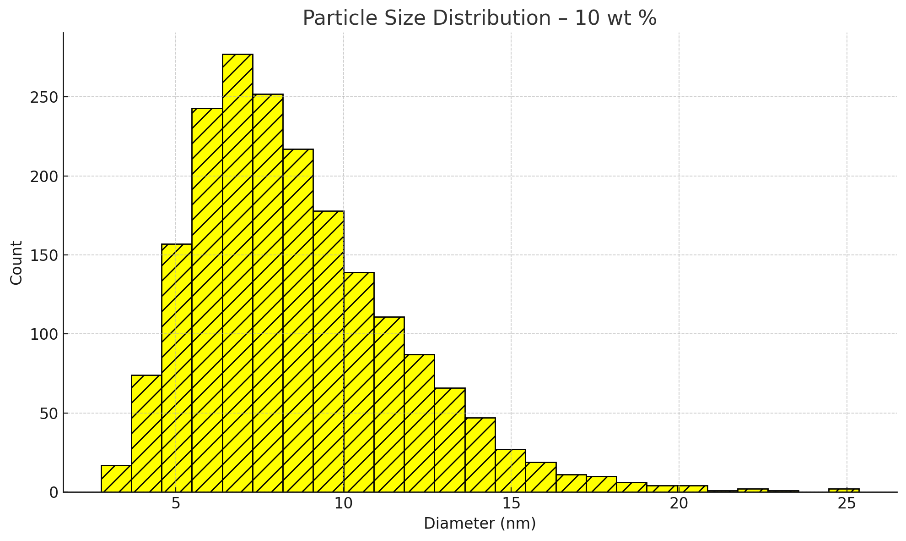


(c)

**FIGURE S1.** Particle size distribution for (a) 5 % Cr/SBA-15, (b) 7 % Cr/SBA-15 and (c) 10 % Cr/SBA-15 based on three (50 nm, 100 nm, and 200 nm) TEM images per sample.


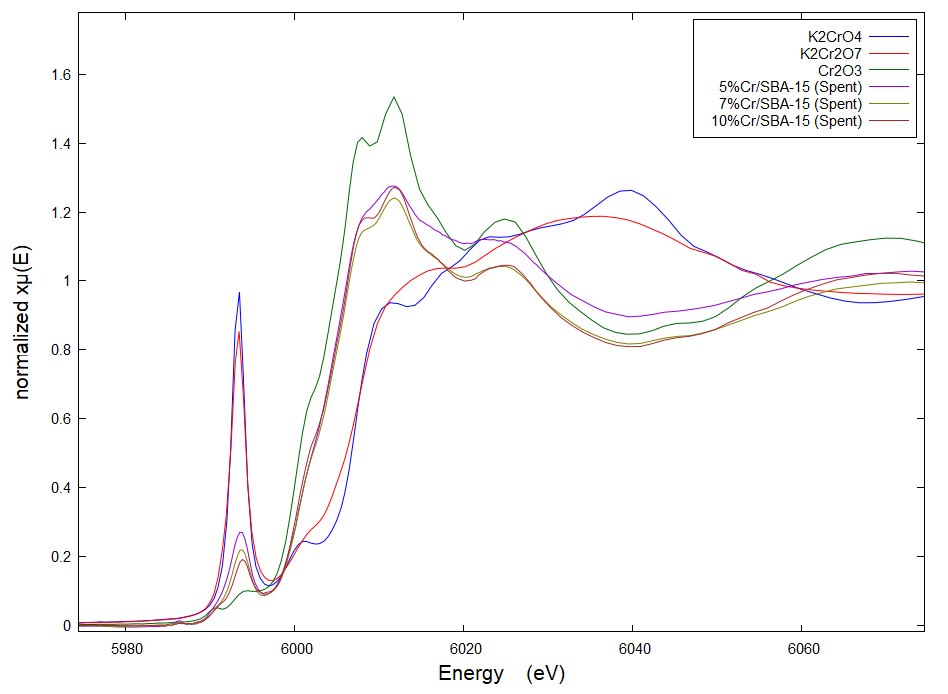


**FIGURE S2.** Normalized Cr K-edge XANES spectra of Cr/SBA-15 spent catalysts compared to Cr³⁺ and Cr⁶⁺ standards.
