# Supplementary material for: Optimization of Cr/SBA-15 Catalysts for CO₂-Assisted Oxidative Dehydrogenation of Propane to Propylene
Source: Research Square preprint supplement (doi:10.21203/rs.3.rs-7585968/v1), 2025-09-22
Supplement: Supplementary file 2 [file a0b2d5be759b8673e2a60702.docx]

**TABLE 1.** Experimental factors and levels used in the Taguchi L9(3³) orthogonal array design.

| Factor | Level 1 | Level 2 | Level 3 |
| --- | --- | --- | --- |
| Reaction temperature (°C) | 550 | 600 | 650 |
| Cr loading (wt %) | 5 | 7 | 10 |
| W/F ratio (g min mL⁻¹) | 0.01 | 0.015 | 0.02 |

**TABLE 2.** BET surface area, pore diameter, and pore volume of SBA-15 support and Cr/SBA-15 catalysts.

| Sample name | SBET (m2/g) | Average pore diameter (Å) | Average pore volume (cm3/g) |
| --- | --- | --- | --- |
| SBA-15 Support | 623 | 63.0 | 0.87 |
| 5 % Cr/SBA-15 | 494 | 43.8 | 0.52 |
| 7 % Cr/SBA-15 | 486 | 42.6 | 0.47 |
| 10 % Cr/SBA-15 | 457 | 43.2 | 0.44 |

**TABLE 3.** XANES–LCF chromium speciation for Cr/SBA-15 catalysts (fresh vs. spent).

| **Catalyst** | **Cr Loading (wt %)** | **Cr⁶⁺ (%)** | **Cr³⁺ (%)** | **Cr⁶⁺/Cr³⁺** |
| --- | --- | --- | --- | --- |
| Fresh | 5 | 43.5 | 56.5 | 0.77 |
| 7 | 46.6 | 53.4 | 0.87 |
| 10 | 38.4 | 61.6 | 0.62 |
| Spent | 5 | 33.0 | 67.0 | 0.49 |
| 7 | 37.6 | 62.4 | 0.60 |
| 10 | 33.5 | 66.5 | 0.50 |

*LCF uncertainties were ±2–3 % absolute for component fractions.

** The Cr⁶⁺/Cr³⁺ ratios of all spent catalysts were determined under the optimal operating conditions (600 °C, W/F = 0.015 g min mL⁻¹), see Table 4.

**TABLE 4.** Catalytic performance of Cr/SBA-15 catalysts under Taguchi L9(3³) reaction conditions.

| **No** | **T (oC)** | **Cr Loading (Wt %)** | **W/F**  **(g min mL-1)** | **Propane Conversion (%)** | **CO2 Conversion (%)** | **Propylene Selectivity (%)** | **Ethylene Selectivity (%)** |
| --- | --- | --- | --- | --- | --- | --- | --- |
| 1 | 550 | 5 | 0.01 | 22.3 | 11.0 | 70.3 | 3.0 |
| 2 | 7 | 0.015 | 18.6 | 3.2 | 88.4 | 5.0 |
| 3 | 10 | 0.02 | 28.8 | 12.7 | 75.8 | 3.3 |
| 4 | 600 | 5 | 0.015 | 33.2 | 8.7 | 83.8 | 5.8 |
| 5 | 7 | 0.02 | 32.6 | 8.2 | 84.1 | 6.4 |
| 6 | 10 | 0.01 | 25.6 | 7.9 | 83.5 | 6.8 |
| 7 | 650 | 5 | 0.02 | 45.5 | 13.4 | 74.4 | 17.1 |
| 8 | 7 | 0.01 | 37.4 | 11.8 | 71.6 | 15.8 |
| 9 | 10 | 0.015 | 40.4 | 13.8 | 72.3 | 14.8 |
| **10** | **600** | **7** | **0.015** | **37.1** | **14.4** | **84.0** | **5.5** |

* Each catalyst was tested in duplicate, and error calculations were based on data from two experimental runs, with two GC injections per run. Standard deviations (n = 4) were ≤ 1.1 % for propane conversion, ≤ 0.3 % for CO₂ conversion, ≤ 1.0 % for propylene selectivity, and ≤ 0.3 % for ethylene selectivity. Complete error calculations and carbon mass balance are provided in Table S4 of the supplementary materials.

** Run (1-10) conditions: CO2/C3H8 = 2/1, P = 1 atm, feed flow rate = 50 mLmin-1, and Run duration= 6 hours (TOS = 30 min). TOS, time-on-stream.

*** Run 10: the results are under the optimal conditions identified through the Taguchi DOE.
